# Supplementary material for: Quantifying the response of water and carbon balances to land cover and climate extremes across Germany
Source: Copernicus journal article supplement (doi:10.5194/egusphere-2025-1629), 2025-08-04
Supplement: Supplementary file 1 [file egusphere-2025-1629-supplement.zip]

# **Quantifying the response of water and carbon balances to land cover and climate extremes across Germany.**

Karim Pyarali<sup>1,2\*</sup>, Lulu Zhang<sup>2\*</sup>, Ning Liu<sup>4</sup>, Abdulhakeem Al-Qubati<sup>1,2</sup> and Ge Sun<sup>3\*</sup>

<sup>1</sup>Technische Universität Dresden, Helmholtzstr. 10, 01069, Dresden, Germany.

<sup>2</sup>United Nations University, Institute for Integrated Management of Material Fluxes and of Resources, Ammonstrasse 74, 01067, Dresden, Germany.

<sup>3</sup>Eastern Forest Environmental Threat Assessment Center, Southern Research Station, USDA Forest Service, Research Triangle Park, NC 27709, USA.

<sup>4</sup>CSIRO Environment, Canberra ACT 2601.

\*Corresponding authors: Karim Pyarali ([karim.pyarali@tu-dresden.de](mailto:karim.pyarali@tu-dresden.de)); Lulu Zhang ([lzhang@unu.edu](mailto:lzhang@unu.edu)); Ge Sun ([Ge.Sun@usda.gov](mailto:Ge.Sun@usda.gov))

## **Contents of this file**

Tables S1 to S6

## **Introduction**

This supporting information provides the tables that supplements the main scientific conclusions of the paper.

Table S1: Regression coefficient parameters for GPP and Re estimated using eddy covariance measurements collected from the works of Zhang et al, (2016) and Sun et al., (2011).

| Land Cover                 | IGBP | GPP parameter (a) | Ecosystem Respiration (Re) parameter |           |
|----------------------------|------|-------------------|--------------------------------------|-----------|
|                            |      |                   | Intercept (m)                        | Slope (n) |
| Urban                      | Urb  | 0                 | 0                                    | 0         |
| Croplands                  | CRO  | 2.533             | 40.6                                 | 0.43      |
| Deciduous Broadleaf Forest | DBF  | 3.28              | 30.8                                 | 0.45      |
| Evergreen Needleleaf       | ENF  | 2.71              | 9.9                                  | 0.68      |
| Mixed Forests              | MF   | 3.349             | 24.4                                 | 0.62      |
| Grasslands                 | GRA  | 2.333             | 18.9                                 | 0.64      |
| Closed Shrublands          | CSH  | 1.734             | 11.4                                 | 0.69      |
| Open Shrublands            | OSH  | 1.679             | 9.7                                  | 0.56      |
| Wetlands                   | WET  | 1.66              | 7.8                                  | 0.56      |
| Water                      | WAT  | 0                 | 0                                    | 0         |

Table S2: Land cover reclassification and share of new classes in German landscape.

| IGBP Description                                         | IGBP Abbreviations | Reclassification | CORINE Class Range | Percentage of Germany (%) |
|----------------------------------------------------------|--------------------|------------------|--------------------|---------------------------|
| Urban                                                    | Urb                | 1                | 111 - 133          | 8.90                      |
| Croplands                                                | CRO                | 2                | 141 - 243          | 57.8                      |
| Deciduous Broadleaf Forests                              | DBF                | 3                | 311                | 10.2                      |
| Evergreen Needleleaf Forests                             | ENF                | 4                | 312                | 16.6                      |
| Mixed Forests                                            | MF.                | 5                | 313                | 3.70                      |
| Grasslands                                               | GRA                | 6                | 321                | 0.40                      |
| Closed Shrubland                                         | CSH                | 7                | 322 - 324          | 0.90                      |
| Open Shrubland                                           | OSH                | 8                | 331 - 335          | 0.04                      |
| Wetlands                                                 | WET                | 9                | 411 - 423          | 0.30                      |
| Water Bodies                                             | WAT                | 10               | 511 - 523          | 1.20                      |
| * CORINE: Coordination of Information on the Environment |                    |                  |                    |                           |
| ** IGBP: International Geosphere-Biosphere Programme     |                    |                  |                    |                           |

Table S3: Monthly resolution model validation results of discharge for 12 representative watersheds across Germany.

| Station Name     | Simulated Watershed ID | Observed Station ID | NSE   | RMSE  | KGE   |
|------------------|------------------------|---------------------|-------|-------|-------|
| Bentfeld         | 302                    | 6335082             | 0.32  | 15.53 | 0.53  |
| Colnrade OP      | 186                    | 6337050             | 0.79  | 6.33  | 0.78  |
| Wasserthaleben   | 357                    | 6340220             | -7.47 | 16.98 | -1.48 |
| Treuchlingen     | 632                    | 6342522             | 0.34  | 10.90 | 0.53  |
| Bad Rotenfels    | 664                    | 6335710             | 0.68  | 32.56 | 0.83  |
| Kirchen-Hausen   | 766                    | 6342980             | 0.69  | 20.12 | 0.83  |
| Treia            | 4                      | 6338800             | 0.64  | 12.68 | 0.76  |
| Goeritzhain      | 429                    | 6340625             | 0.73  | 13.90 | 0.80  |
| Lohmar           | 427                    | 6335048             | 0.76  | 18.69 | 0.79  |
| Kleinbengerstorf | 58                     | 6340070             | 0.00  | 07.09 | 0.20  |
| Schoenach        | 639                    | 6342640             | -0.66 | 10.75 | 0.09  |
| Niedertrebra     | 424                    | 6340320             | 0.03  | 13.35 | 0.47  |

Table S4: Overall model validation for discharge comparing mean annual values for 12 watersheds across Germany. Station names are linked to the same station and watershed ID presented in Table S3.

| Station Name     | Mean Annual runoff |           |               |            | Predicted vs Observed<br>R <sup>2</sup> |                           |
|------------------|--------------------|-----------|---------------|------------|-----------------------------------------|---------------------------|
|                  | Observed           | Predicted | Model<br>bias | Model bias | Annual<br>R <sup>2</sup>                | Monthly<br>R <sup>2</sup> |
|                  | mm                 | mm        | mm            | %          |                                         |                           |
| Bentfeld         | 338.72             | 358.37    | 19.66         | 5.80       | 0.82                                    | 0.70                      |
| Colnrade OP      | 227.99             | 181.63    | -46.36        | -20.33     | 0.93                                    | 0.87                      |
| Wasserthaleben   | 70.14              | 162.60    | 92.46         | 131.81     | 0.18                                    | 0.30                      |
| Treuchlingen     | 183.39             | 202.51    | 19.11         | 10.42      | 0.70                                    | 0.70                      |
| Bad Rotenfels    | 979.44             | 926.96    | -52.48        | -5.36      | 0.85                                    | 0.73                      |
| Kirchen-Hausen   | 553.40             | 521.76    | -31.65        | -5.72      | 0.88                                    | 0.73                      |
| Treia            | 439.24             | 352.85    | -86.39        | -19.67     | 0.75                                    | 0.79                      |
| Goeritzhain      | 412.82             | 345.10    | -67.72        | -16.40     | 0.85                                    | 0.75                      |
| Lohmar           | 683.65             | 584.69    | -98.96        | -14.48     | 0.91                                    | 0.84                      |
| Kleinbengerstorf | 152.63             | 158.53    | 5.91          | 3.87       | 0.95                                    | 0.83                      |
| Schoenach        | 206.31             | 214.90    | 8.59          | 4.17       | 0.63                                    | 0.60                      |
| Niedertrebra     | 204.75             | 203.89    | -0.86         | -0.42      | 0.55                                    | 0.50                      |

Table S5: Land cover specific ET validation for WaSSI ET data using corrected and uncorrected eddy flux ET data across thirteen different sites in Germany.

| Eddy Flux Tower   | WS ID | Land cover | Period                    | Uncorrected Observed ET (mm mon <sup>-1</sup> ) |             |                 |                 |        |      | Corrected Observed ET (mm mon <sup>-1</sup> ) |             |                 |                 |        |      |
|-------------------|-------|------------|---------------------------|-------------------------------------------------|-------------|-----------------|-----------------|--------|------|-----------------------------------------------|-------------|-----------------|-----------------|--------|------|
|                   |       |            |                           | R2                                              | Correlation | Obs Annual Mean | Sim Annual Mean | Bias % | KGE  | R2                                            | Correlation | Obs Annual Mean | Sim Annual Mean | Bias % | KGE  |
| Selhausen Juelich | 457   | CRO        | 2011 - 2015               | 0.74                                            | 0.86        | 653.35          | 542.58          | -16.95 | 0.67 | 0.74                                          | 0.87        | 755.82          | 518.88          | -31.35 | 0.53 |
| Klingenberg       | 394   |            | 2004 - 2015               | 0.57                                            | 0.76        | 343.24          | 536.49          | 56.30  | 0.38 | 0.62                                          | 0.79        | 491.34          | 533.62          | 8.60   | 0.63 |
| Gebsee            | 415   |            | 2001 - 2015               | 0.77                                            | 0.88        | 363.54          | 490.24          | 34.85  | 0.58 | 0.75                                          | 0.87        | 415.84          | 490.24          | 17.89  | 0.60 |
| Hainich           | 390   | DBF        | 2001 - 2011               | 0.85                                            | 0.92        | 379.93          | 469.26          | 23.51  | 0.70 | 0.86                                          | 0.93        | 414.78          | 454.79          | 9.65   | 0.70 |
| Leinefelde        | 390   |            | 2002 – 2006 & 2010 - 2013 | 0.81                                            | 0.90        | 397.09          | 500.78          | 26.11  | 0.67 | 0.85                                          | 0.92        | 447.64          | 500.78          | 11.87  | 0.70 |
|                   |       |            |                           |                                                 |             |                 |                 |        |      |                                               |             |                 |                 |        |      |
| Lackenberg        | 631   | ENF        | 2009 - 2015               | 0.64                                            | 0.80        | 494.10          | 608.61          | 23.17  | 0.54 | 0.76                                          | 0.87        | 377.05          | 574.46          | 52.36  | 0.43 |
| Oberbärenburg     | 394   |            | 2008 - 2015               | 0.83                                            | 0.91        | 372.56          | 577.34          | 54.97  | 0.43 | 0.85                                          | 0.92        | 473.79          | 577.34          | 21.86  | 0.72 |
| Tharandt          | 394   |            | 2001 - 2015               | 0.85                                            | 0.92        | 387.96          | 575.36          | 48.31  | 0.46 | 0.90                                          | 0.95        | 463.02          | 575.36          | 24.26  | 0.75 |
| Grillenburg       | 394   | GRA        | 2004 - 2015               | 0.79                                            | 0.89        | 367.44          | 439.02          | 19.48  | 0.68 | 0.80                                          | 0.90        | 615.46          | 427.31          | -30.57 | 0.39 |
| Rollesbroich      | 457   |            | 2011 - 2015               | 0.74                                            | 0.86        | 558.22          | 558.15          | -0.01  | 0.80 | 0.71                                          | 0.85        | 694.15          | 547.05          | -21.19 | 0.65 |
| Schechenfilz Nord | 737   | WET        | 2012 - 2015               | 0.32                                            | 0.58        | 610.97          | 642.85          | 5.22   | 0.53 | 0.11                                          | 0.37        | 868.83          | 635.76          | -26.83 | 0.17 |
| Spreewald         | 269   |            | 2010 - 2014               | 0.74                                            | 0.86        | 432.02          | 524.12          | 21.32  | 0.70 |                                               |             | NA              |                 |        |      |
| Anklam            | 23    |            | 2009 - 2014               | 0.26                                            | 0.54        | 628.52          | 527.12          | -16.13 | 0.39 |                                               |             | NA.             |                 |        |      |

Table S6: Mean annual comparison between WaSSI-ET and  $P - Q_{\text{observed}}$ 

| Station ID       | Period      | Mean Annual   |                      |                      |          |            |            |
|------------------|-------------|---------------|----------------------|----------------------|----------|------------|------------|
|                  |             | Precipitation | $PET_{\text{hamon}}$ | $P - Q_{\text{obs}}$ | WaSSI-ET | Model bias | Model bias |
|                  |             | mm            | mm                   | mm                   | mm       | mm         | %          |
| Bentfeld         | 2001 - 2016 | 908.56        | 631.57               | 569.84               | 554.45   | -15.39     | -2.7       |
| Colnrade OP      | 2001 - 2015 | 722.75        | 666.29               | 494.76               | 539.25   | 44.49      | 8.99       |
| Wasserthaleben   | 2001 - 2016 | 666.00        | 622.17               | 598.21               | 508.6    | -89.61     | -14.98     |
| Treuchlingen     | 2001 - 2016 | 735.39        | 634.80               | 551.99               | 533.97   | -18.02     | -3.26      |
| Bad Rotenfels    | 2001 - 2016 | 1544.69       | 598.57               | 565.25               | 633.25   | 68.01      | 12.03      |
| Kirchen-Hausen   | 2001 - 2008 | 1127.43       | 571.81               | 574.03               | 566.28   | -7.75      | -1.35      |
| Treia            | 2001 - 2016 | 901.89        | 635.48               | 462.66               | 564.34   | 101.68     | 21.98      |
| Goeritzhain      | 2001 - 2015 | 868.60        | 629.38               | 455.79               | 516.94   | 61.15      | 13.42      |
| Lohmar           | 2001 - 2011 | 1193.33       | 619.96               | 540.98               | 583.38   | 42.4       | 7.84       |
| Kleinbengerstorf | 2001 - 2012 | 691.67        | 645.23               | 542.51               | 532.74   | -9.77      | -1.8       |
| Schoenach        | 2001 - 2016 | 768.07        | 643.80               | 561.76               | 551.53   | -10.24     | -1.82      |
| Niedertrebra     | 2001 - 2016 | 720.57        | 620.55               | 521.22               | 516.47   | -4.75      | -0.91      |
