# Supplementary material for: Quantifying the response of water and carbon balances to land cover and climate extremes across Germany
Source: Copernicus journal article supplement (doi:10.5194/egusphere-2025-1629), 2025-08-04
Supplement: Supplementary file 2 [file egusphere-2025-1629-supplement.zip]

# **Quantifying the response of water and carbon balances to land cover and climate extremes across Germany.**

Karim Pyarali<sup>1,2\*</sup>, Lulu Zhang<sup>2\*</sup>, Ning Liu<sup>4</sup>, Abdulhakeem Al-Qubati<sup>1,2</sup> and Ge Sun<sup>3\*</sup>

<sup>1</sup>Technische Universität Dresden, Helmholtzstr. 10, 01069, Dresden, Germany.

<sup>2</sup>United Nations University, Institute for Integrated Management of Material Fluxes and of Resources, Ammonstrasse 74, 01067, Dresden, Germany.

<sup>3</sup>Eastern Forest Environmental Threat Assessment Center, Southern Research Station, USDA Forest Service, Research Triangle Park, NC 27709, USA.

<sup>4</sup>CSIRO Environment, Canberra ACT 2601.

\*Corresponding authors: Karim Pyarali ([karim.pyarali@tu-dresden.de](mailto:karim.pyarali@tu-dresden.de)); Lulu Zhang ([lzhang@unu.edu](mailto:lzhang@unu.edu)); Ge Sun ([Ge.Sun@usda.gov](mailto:Ge.Sun@usda.gov))

## **Contents of this file**

Figures S1 to S3

## **Introduction**

This supporting information provides the figures that supplements the main scientific conclusions of the paper.

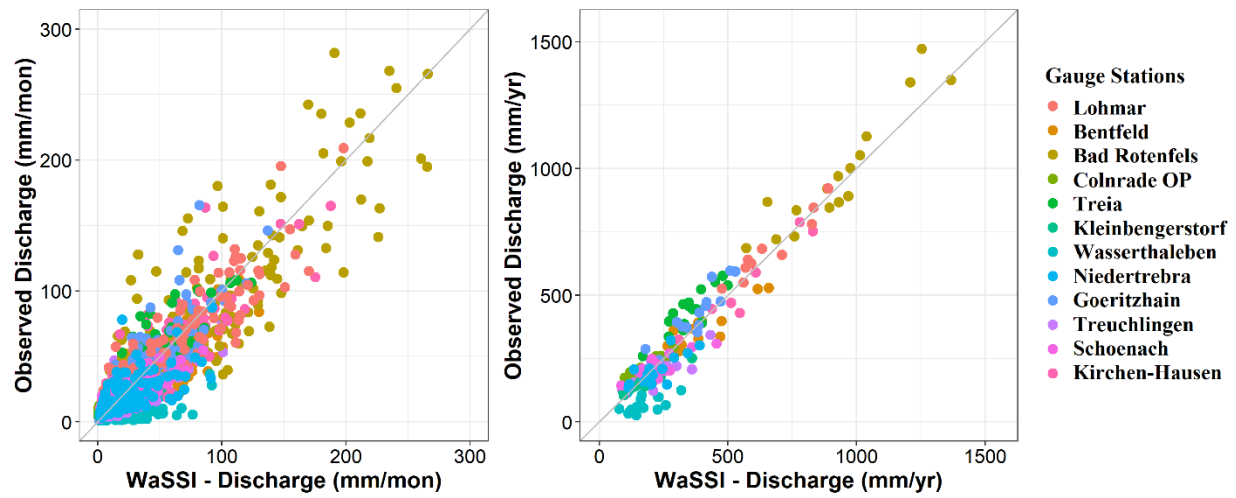

**Figure S1:** Monthly and Annual scatter plot between simulation and observed discharge for twelve different watersheds (2001-2019). The line running diagonally through the plot is a 1:1 line. Legends represent gaging station names.

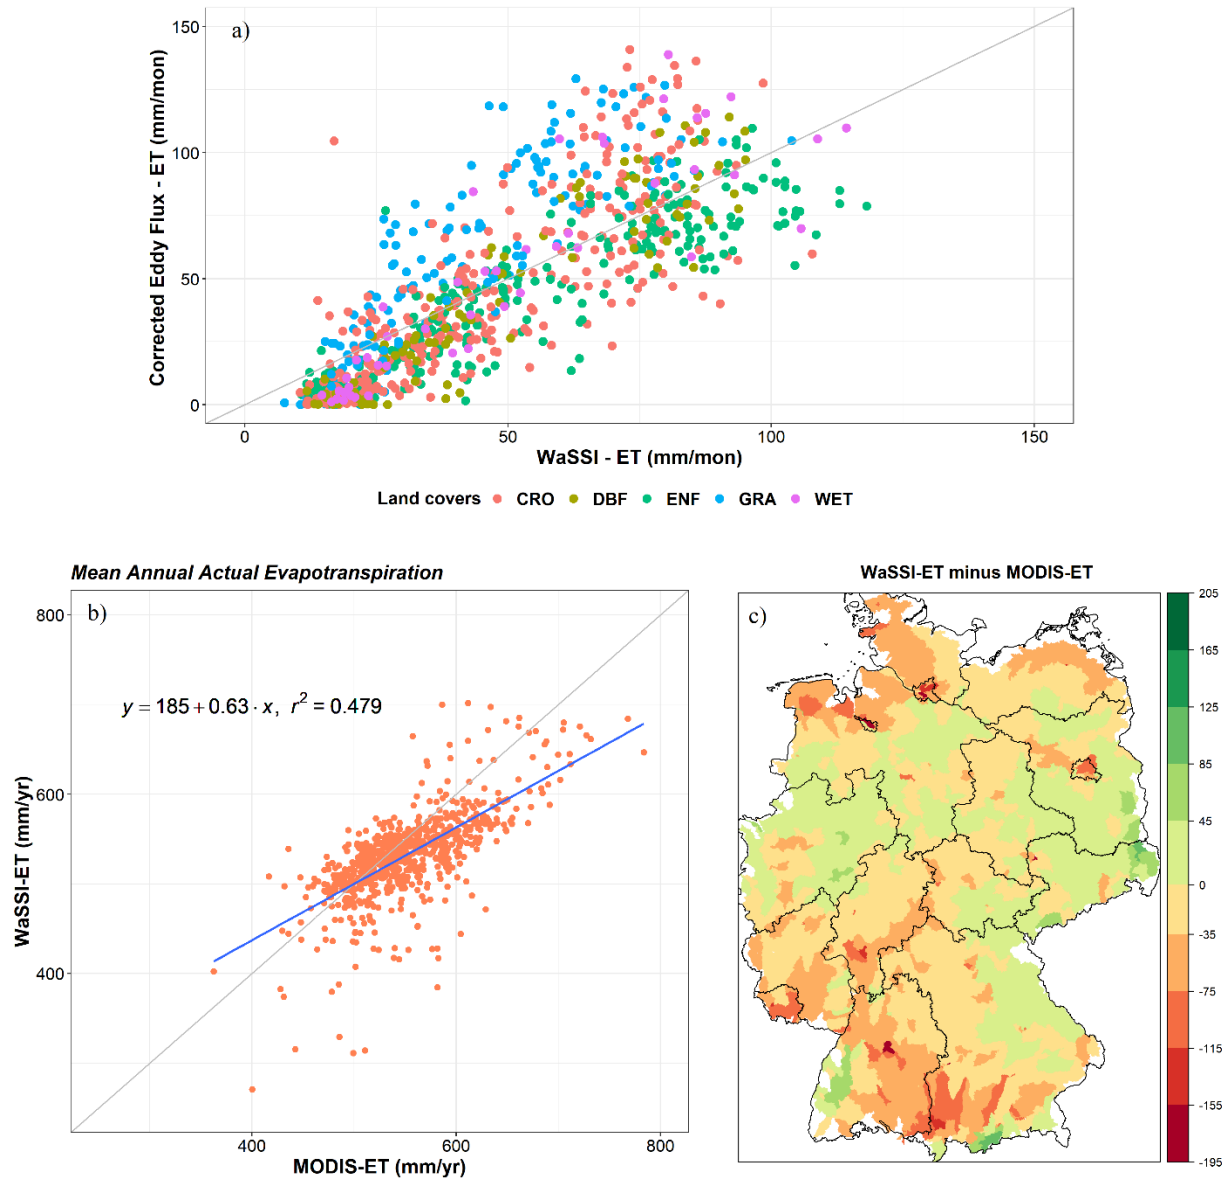

**Figure S2:** a) Monthly scatter plot between corrected ET from eddy flux towers and WaSSI-ET. The plot covers eleven different sites representing five different land covers. The line running diagonally through the plot is a 1:1 line. b) Mean annual WaSSI-ET validation w.r.t to MODIS-ET from 2001 to 2019 is presented in a scatter plot and c) difference map in mm to illustrate the magnitude and distribution of spatial similarities between the datasets across Germany.

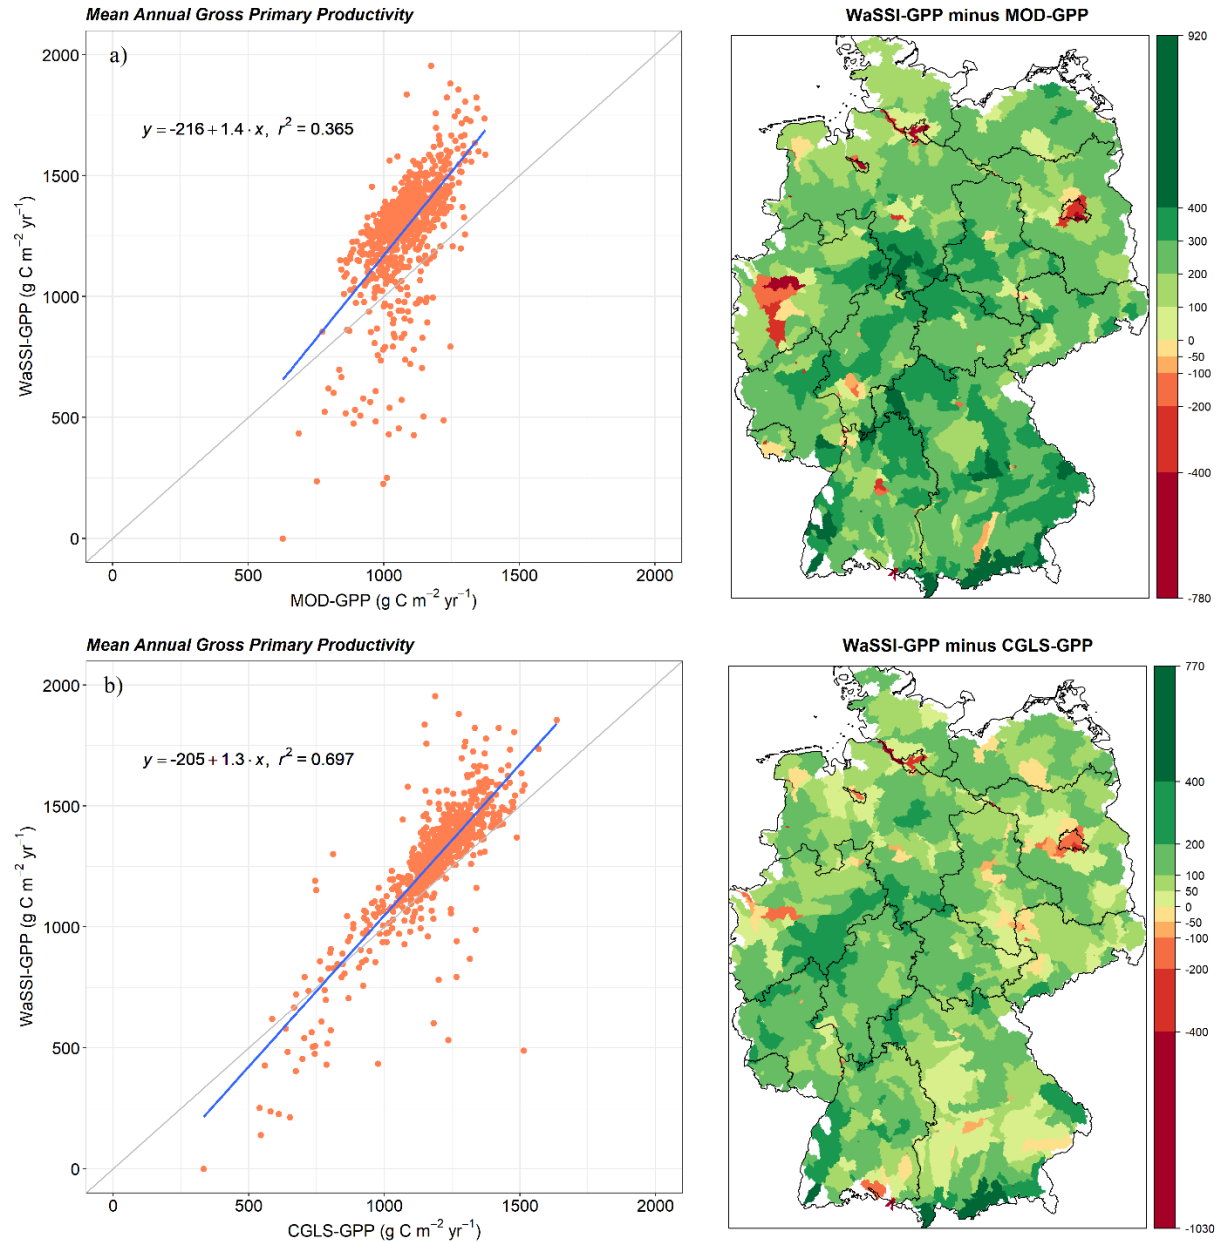

**Figure S3: a)** Mean annual WaSSI-GPP validation w.r.t to MODIS-GPP from 2001 to 2019 is presented in a scatter plot and difference map (in mm) to illustrate the magnitude and distribution of spatial similarities between the datasets across Germany. **b)** Mean annual WaSSI-GPP validation w.r.t to CGLS-ET from 2001 to 2019 is presented in a scatter plot and difference map (in mm) to illustrate the magnitude and distribution of spatial similarities between the datasets across Germany.
